# Supplementary material for: Dimethyl sulfoxide blocks herpes simplex virus-1 productive infection in vitro acting at different stages with positive cooperativity. Application of micro-array analysis
Source: Springer Nature journal article supplement (doi:10.1186/1471-2334-2-9), 2002-05-24
Supplement: Additional file 1 [file 1471-2334-2-9-s1.doc]

Table 1

HSV-1 Transcript Abundance in the Presence or Absence of 4% DMSO or 300 g/ml PAA at 6 hr post infection with HSV-1

| Transcript/  Class1 | Function2 | 6 hr (Control) | | 6 hr DMSO | | 6 hr PAA | | DMSO/Cont | | PAA/Cont | | PAA/DMSO | |
| --- | --- | --- | --- | --- | --- | --- | --- | --- | --- | --- | --- | --- | --- |
| Mn3 | SD | Mn4 | SD | Mn4 | SD | variance (p)5 | Change | variance (p)5 | Change | variance (p)5 | Change |
| U1 (L)1 | GL | 33785 | 7403 | 5830 | 1731 | 4270 | 2173 | 0.0008 | -5.8 | 0.0006 | -7.9 | 0.3859 | -1.4 |
| U1X (?) | Unknown | 1861 | 1517 | 1133 | 382 | 540 | 73 | 0.4583 | -1.6 | 0.1950 | -3.4 | 0.0577 | -2.1 |
| **U3 (L)** | Nonvirion membrane protein (?) | **18464** | **6477** | **4205** | **1256** | **1852** | **343** | **0.0106** | **-4.4** | **0.0051** | **-10.0** | **0.0352** | **-2.3** |
| **U4-5' (E)** | Tegument protein | **17562** | **5656** | **6218** | **1580** | **3377** | **441** | **0.0164** | **-2.8** | **0.0057** | **-5.2** | **0.0399** | **-1.8** |
| U4/5 (E/E) | 5--part of helicase/primase complex | 39043 | 18677 | 8884 | 3769 | 14649 | 3629 | 0.0365 | -4.4 | 0.0731 | -2.7 | 0.1290 | 1.6 |
| U6/7 (L/?) | capsid maturation/Unknown | 28728 | 2325 | 7095 | 3475 | 9155 | 2628 | 0.0000 | -4.0 | 0.0000 | -3.1 | 0.4588 | 1.3 |
| U8/9 (E/E) | 9--ori binding protein | 14979 | 5865 | 5250 | 1488 | 6744 | 1733 | 0.0338 | -2.9 | 0.0607 | -2.2 | 0.3208 | 1.3 |
| U8-5' (E) | helcase primase complex | 10028 | 2767 | 6353 | 2294 | 6208 | 2147 | 0.1031 | -1.6 | 0.0887 | -1.6 | 0.9399 | -1.0 |
| U10 (L) | GM | 30522 | 6969 | 5773 | 3042 | 6515 | 3943 | 0.0013 | -5.3 | 0.0017 | -4.7 | 0.8091 | 1.1 |
| U11/13 (L/E/L) | 11-capsid egress and envelopment; 12-alkaline exonuclease, 13- tegument protein | 93813 | 26031 | 40642 | 15071 | 13056 | 7673 | 0.0193 | -2.3 | 0.0022 | -7.2 | 0.0476 | -3.1 |
| U16/17 (L?L) | 16 Unknown; 17 DNA packaging | 38861 | 4381 | 7118 | 2959 | 4188 | 175 | 0.0000 | -5.5 | 0.0000 | -9.3 | 0.1620 | -1.7 |
| U15 (EL) | DNA packaging | 6365 | 2597 | 2487 | 1912 | 1306 | 342 | 0.0681 | -2.6 | 0.0174 | -4.9 | 0.3520 | -1.9 |
| U18/20 (EL/EL/L) | 18-triplex | 70468 | 16580 | 8748 | 3465 | 10696 | 4345 | 0.0008 | -8.1 | 0.0010 | -6.6 | 0.5766 | 1.2 |
| U19/20 (EL/L) | 20-virion egress | 68646 | 11785 | 7297 | 1405 | 10092 | 1840 | 0.0001 | -9.4 | 0.0002 | -6.8 | 0.1047 | 1.4 |
| U19-5' (EL) | VP5, major capsid protein, hexon | 23366 | 10950 | 7043 | 3048 | 5349 | 2105 | 0.0496 | -3.3 | 0.0340 | -4.4 | 0.4726 | -1.3 |
| U21 (E) | Tegument virion maturation (?) | 7379 | 2677 | 999 | 666 | 1359 | 512 | 0.0077 | -7.4 | 0.0097 | -5.4 | 0.4992 | 1.4 |
| U22 (L) | gH involved in viral entry with gL | 36924 | 7927 | 7992 | 2564 | 4310 | 2303 | 0.0010 | -4.6 | 0.0005 | -8.6 | 0.1380 | -1.9 |
| U23 (E) | TK, thymidine kinase | 75859 | 11003 | 14742 | 5068 | 17922 | 973 | 0.0001 | -5.1 | 0.0001 | -4.2 | 0.3459 | 1.2 |
| U24 (EL) | Unknown | 24062 | 9804 | 5130 | 1290 | 7259 | 843 | 0.0180 | -4.7 | 0.0285 | -3.3 | 0.0750 | 1.4 |
| U25 (L) | DNA packaging | 83933 | 10432 | 8577 | 3173 | 10307 | 1935 | 0.0000 | -9.8 | 0.0000 | -8.1 | 0.4652 | 1.2 |
| **U27/8 (EL/L)** | 28-maturational protease | **84314** | **20332** | **7451** | **1717** | **14244** | **2512** | **0.0007** | **-11.3** | **0.0012** | **-5.9** | **0.0180** | **1.9** |
| U27-5' (EL) | gB virus entry | 79807 | 20560 | 12518 | 9327 | 6099 | 759 | 0.0020 | -6.4 | 0.0010 | -13.1 | 0.3005 | -2.1 |
| U29 (E) | ICP8 DNA binding protein | 29102 | 10372 | 3917 | 2541 | 7201 | 4314 | 0.0070 | -7.4 | 0.0145 | -4.0 | 0.3194 | 1.8 |
| U30 (E) | DNA polymerase | 34713 | 9762 | 4610 | 1099 | 8083 | 2289 | 0.0021 | -7.5 | 0.0040 | -4.3 | 0.0769 | 1.8 |
| U31/34 (L/L/L/L) | 31-Nuclear phosphoprotein; 32-DNA packaging; 33-DNA packing; 34-Membrane phosphoprotein | 32785 | 13135 | 8131 | 492 | 5206 | 1806 | 0.0199 | -4.0 | 0.0128 | -6.3 | 0.0537 | -1.6 |
| **U35 (EL)** | capsomer tips | **72690** | **10769** | **12822** | **4901** | **4108** | **746** | **0.0001** | **-5.7** | **0.0000** | **-17.7** | **0.0382** | **-3.1** |
| **U36 (E/L)** | tegument protein(s_ | **21034** | **4786** | **4940** | **1519** | **1620** | **646** | **0.0015** | **-4.3** | **0.0005** | **-13.0** | **0.0253** | **-3.0** |
| U37 (E) | Tegument phosphoproteins | 28192 | 14859 | 9342 | 2695 | 4736 | 1754 | 0.0793 | -3.0 | 0.0386 | -6.0 | 0.0681 | -2.0 |
| U38 (L) | capsid triplex | 22434 | 4327 | 9702 | 4503 | 7600 | 2856 | 0.0073 | -2.3 | 0.0020 | -3.0 | 0.5321 | -1.3 |
| **U39-5' (E)** | Large subunit ribonucleotide reductase | **37859** | **14629** | **8464** | **2166** | **15929** | **3253** | **0.0154** | **-4.5** | **0.0476** | **-2.4** | **0.0297** | **1.9** |
| **U39/40 (E/E)** | 40-Small subunit ribonucleotide reductase | **91200** | **18749** | **14475** | **8024** | **35283** | **5030** | **0.0006** | **-6.3** | **0.0027** | **-2.6** | **0.0190** | **2.4** |
| U41 (EL) | virion host shut-off protein | 9699 | 2508 | 1876 | 1220 | 363 | 155 | 0.0026 | -5.2 | 0.0008 | -26.7 | 0.1000 | -5.2 |
| U42 (E) | Polymerase accesory | 74564 | 14071 | 8281 | 2501 | 7240 | 1600 | 0.0002 | -9.0 | 0.0002 | -10.3 | 0.5763 | -1.1 |
| U43 (E?) | Unknown | 10533 | 5751 | 10919 | 3196 | 5248 | 1961 | 0.9200 | 1.0 | 0.1847 | -2.0 | 0.0588 | -2.1 |
| U43.5-5' (?) | Unknown | 1506 | 1154 | 2223 | 2525 | 1088 | 438 | 0.5922 | 1.5 | 0.5791 | -1.4 | 0.4859 | -2.0 |
| U44-5' (L) | gC, | 46835 | 23166 | 2853 | 683 | 3182 | 1643 | 0.0190 | -16.4 | 0.0197 | -14.7 | 0.7650 | 1.1 |
| U44/45 (L/L) | 45-Membrane associated | 81971 | 14297 | 11265 | 1783 | 10039 | 2753 | 0.0002 | -7.3 | 0.0002 | -8.2 | 0.5527 | -1.1 |
| U46/47 (EL/EL) | Both tegument associated | 88382 | 13266 | 32343 | 15019 | 23072 | 3341 | 0.0015 | -2.7 | 0.0002 | -3.8 | 0.3556 | -1.4 |
| U48 (EL) | alpha TIF | 94885 | 21871 | 19670 | 12594 | 14293 | 7354 | 0.0018 | -4.8 | 0.0010 | -6.6 | 0.5578 | -1.4 |
| U49 (E/L) | tegument protein | 89374 | 10047 | 13168 | 2123 | 19177 | 5100 | 0.0000 | -6.8 | 0.0000 | -4.7 | 0.1327 | 1.5 |
| **U50 (E)** | dUTPase | **84760** | **19897** | **8511** | **2841** | **28674** | **5688** | **0.0007** | **-10.0** | **0.0036** | **-3.0** | **0.0054** | **3.4** |
| U51 (L) | Unknown | 26291 | 5804 | 8117 | 5070 | 8527 | 3722 | 0.0042 | -3.2 | 0.0034 | -3.1 | 0.9157 | 1.1 |
| U52-5' (E) | helicase primase complex | 2333 | 729 | 1426 | 185 | 1149 | 201 | 0.0859 | -1.6 | 0.0369 | -2.0 | 0.1541 | -1.2 |
| U52/53 (E/L) | 53-gK virion egress | 22885 | 6103 | 6565 | 2533 | 8276 | 2155 | 0.0051 | -3.5 | 0.0080 | -2.8 | 0.4233 | 1.3 |
| U54 (IE) | ICP27regulatory protein | 74702 | 16994 | 40113 | 32226 | 10196 | 5699 | 0.0874 | -1.9 | 0.0008 | -7.3 | 0.1885 | -3.9 |
| U55 (E?) | Unknown | 7961 | 3084 | 2248 | 1193 | 1719 | 395 | 0.0241 | -3.5 | 0.0149 | -4.6 | 0.5060 | -1.3 |
| **U56 (E)** | pathogenesis, tegument protein | **16882** | **9927** | **1147** | **553** | **4049** | **561** | **0.0377** | **-14.7** | **0.0734** | **-4.2** | **0.0031** | **3.5** |
| RLXY (L) | unknown | 5152 | 2578 | 1326 | 1222 | 1339 | 1980 | 0.0563 | -3.9 | 0.0721 | -3.8 | 0.9929 | 1.0 |
| RLX (L) | unkown | 19958 | 7006 | 26583 | 10154 | 12945 | 10506 | 0.3105 | 1.3 | 0.2932 | -1.5 | 0.1812 | -2.1 |
| RLAT-5 | reactivation | 2692 | 2466 | 2573 | 2239 | 1690 | 633 | 0.9480 | -1.0 | 0.5274 | -1.6 | 0.5468 | -1.5 |
| RHA6 | truncated LAT | 2995 | 2314 | 1778 | 434 | 1565 | 524 | 0.4157 | -1.7 | 0.3457 | -1.9 | 0.6162 | -1.1 |
| RLAT-I | stable LAT-intron | 1649 | 1263 | 1588 | 1376 | 1371 | 670 | 0.9513 | -1.0 | 0.7420 | -1.2 | 0.8183 | -1.2 |
| **RICP0 (IE)** | **trans-activator** | **37484** | **7106** | **28972** | **5350** | **6075** | **3829** | **0.1265** | **-1.3** | **0.0004** | **-6.2** | **0.0038** | **-4.8** |
| ROP | unknown | 3367 | 2492 | 4453 | 3218 | 9923 | 12519 | 0.6086 | 1.3 | 0.2769 | 2.9 | 0.5042 | 2.2 |
| RICP34.5 (EL) | neurovirulence | 7262 | 2594 | 5409 | 3713 | 1770 | 1561 | 0.4319 | -1.3 | 0.0171 | -4.1 | 0.1927 | -3.1 |
| RLATX | LAT poly(A) site | 5528 | 2265 | 4978 | 1600 | 3782 | 2714 | 0.7281 | -1.1 | 0.3621 | -1.5 | 0.5468 | -1.3 |
| RLAT-3' | LAT poly(A) site | 12279 | 8729 | 5594 | 1645 | 9088 | 5246 | 0.2501 | -2.2 | 0.5931 | -1.4 | 0.3327 | 1.6 |
| RICP4 (IE) | broad range *trans*-activator | 28545 | 13173 | 27624 | 11005 | 21999 | 8733 | 0.9229 | -1.0 | 0.4791 | -1.3 | 0.5262 | -1.3 |
| R/S22 (IE) | host range | 114122 | 14904 | 47956 | 37237 | 14777 | 10727 | 0.0105 | -2.4 | 0.0001 | -7.7 | 0.2122 | -3.2 |
| US2 (E) | unknown | 33112 | 20846 | 2045 | 1816 | 3251 | 1276 | 0.0469 | -16.2 | 0.0533 | -10.2 | 0.3997 | 1.6 |
| US3-5' (EL?) | Protein kinase | 10832 | 3796 | 5289 | 4768 | 6906 | 2652 | 0.1168 | -2.0 | 0.1709 | -1.6 | 0.6346 | 1.3 |
| US3/4 (EL?) | 4-gG | 24474 | 8019 | 4833 | 1008 | 4703 | 1405 | 0.0064 | -5.1 | 0.0063 | -5.2 | 0.9031 | -1.0 |
| US5-5' (EL?) | gJ | 7749 | 3813 | 6364 | 3901 | 7775 | 4700 | 0.6392 | -1.2 | 0.9933 | 1.0 | 0.7095 | 1.2 |
| US5/6/7 (EL/E/E) | 6-gD; 7-gI lateral spread | 76041 | 19344 | 10675 | 3562 | 11137 | 3032 | 0.0014 | -7.1 | 0.0014 | -6.8 | 0.8725 | 1.0 |
| US8-5' (EL?) | gE (Fc binding) | 23256 | 6228 | 11050 | 3158 | 7738 | 2194 | 0.0213 | -2.1 | 0.0067 | -3.0 | 0.2100 | -1.4 |
| US8/9 (EL?) | 9-Tegument phosphoprotein | 86126 | 14556 | 14669 | 10032 | 19133 | 3219 | 0.0003 | -5.9 | 0.0003 | -4.5 | 0.5037 | 1.3 |
| US10/11/12  (E/E/IE) | 10-Tegument protein; 11-Tegument phosphoprotein, 12-ICP47 inhibits MHC1 | 100018 | 19543 | 12712 | 4180 | 8391 | 2729 | 0.0003 | -7.9 | 0.0002 | -11.9 | 0.2081 | -1.5 |

Notes for Table 1.

### 1I.E.--immediate early, E--early (attains maximal levels at or near maximal DNA replication and then declines); EL-leaky late (attains appreciable levels prior to maximal or in the absence of viral DNA replication and increases markedly thereafter. L-attains high level only after viral DNA replication takes place. **Bold type indicates transcripts with levels significantly different from controls both in DMSO and PAA**.

2See [27, 31].

3Median value of five (5) independent experiments. Each experiment provided signal intensities determined by calculating the median of SSC-background-subtracted values from 3, 6, or 9 replicates. The absolute values were then normalized to the 75th percentile signal strength for each hybridization [6].

4Median value of three (3) independent experiments. Data was processed as described in note (2).

5The Null hypothesis (p=1) is that control and experimental groups are identical, and has been tested using Student's t-test with 2-tail distribution and assuming unequal variance [32].
